# Supplementary material for: Long-Term Follow-Up into Adulthood of Pediatric-Onset Primary Sclerosing Cholangitis and Autoimmune Sclerosing Cholangitis
Source: PubMed Central journal article supplement (PMC10158455; doi:10.1097/pg9.0000000000000220), 2022-06-21
Supplement: pg9-3-e220-s001.pdf [file pg9-3-e220-s001.pdf]

**A**

### Serum IgG levels as predictors of Auto-immune cholangitis

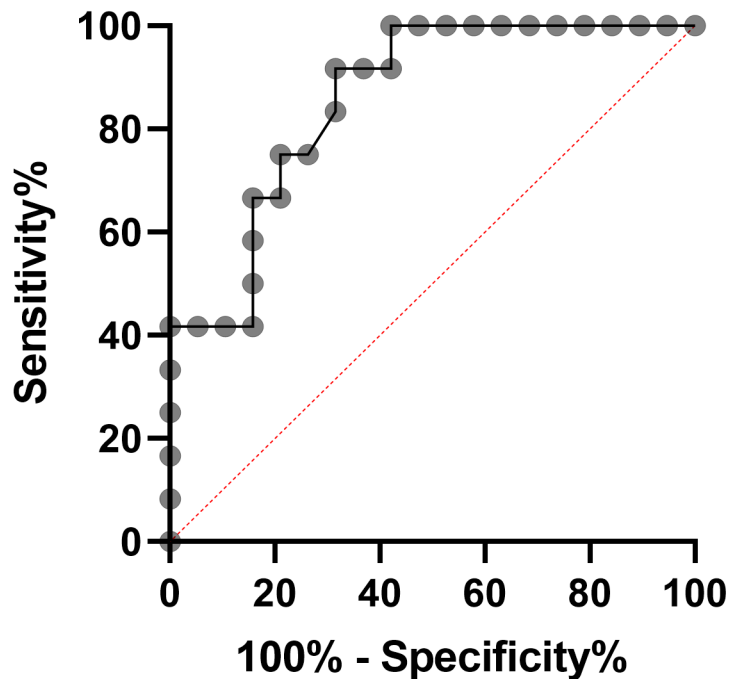

AUROC 0.8575  
(95% CI:0.7291 to 0.9858)  
p=0.0009

**B**

### Serum IgG levels as predictors of Auto-immune cholangitis within group of patients with Anti-Nuclear Antibodies

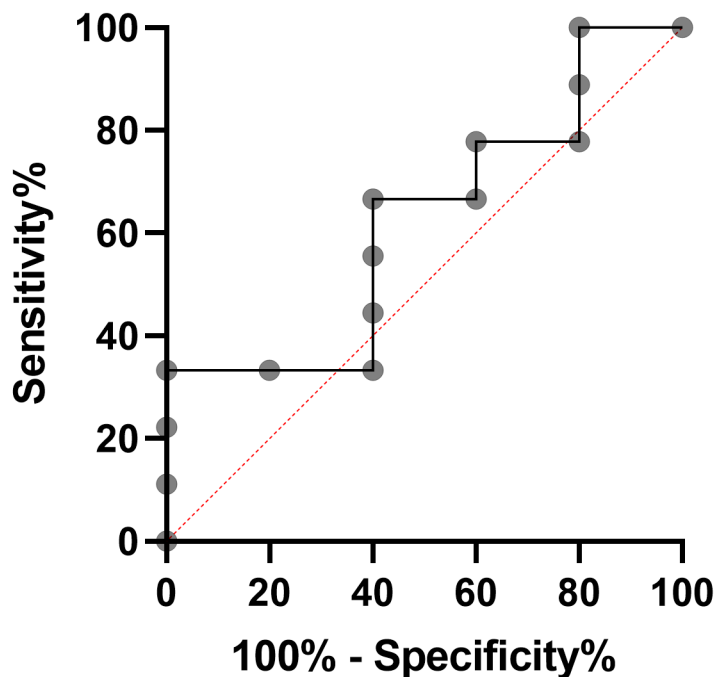

AUROC 0.6222  
(95% CI:0.3098 to 0.9347)  
p=0.46
